# Supplementary material for: Living cationic ring-opening polymerization by water-stable initiator: synthesis of a well-defined optically active polythiourethaneElectronic supplementary information (ESI) available: experimental details. See http://www.rsc.org/suppdata/cc/b3/b310735c/
Source: Royal Society of Chemistry journal article supplement (doi:10.1039/b310735c), 2003-01-01
Supplement: b310735c.doc [file b310735c.doc]

**Electronic supplementary information (ESI)**

*Synthesis of benzoic acid 2-thioxo-oxazolidin-4-ylmethyl ester*

Synthesis of 4-hydroxymethyl-1,3-oxazolidine-2-thione: To a suspension of serionol (18.2 g, 200 mmol) in MeOH (200 mL) was added triethylamine (55.4 mL, 200 mmol) slowly at 0 °C under nitrogen atmosphere, and then was added a solution of carbon disulfide (22.84 g, 300 mmol) in MeOH (20 mL) at 0 °C. The mixture was stirred at 0 °C for 10 min, and then at room temperature for 1 h. After that, aqueous hydrogen peroxide (30 %, 40 mL) was slowly added to the resulting mixture at room temperature, and the mixture was concentrated by a rotary evaporator. The residue was purified by silica gel column chromatography eluted with chloroform/acetone (6/4=v/v), followed by recrystallization from a mixed solvent [*n*-hexane/ethyl acetate (2/1=v/v)] to afford 4-hydroxymethyl-1,3-oxazolidine-2-thione as a colorless solid (26.2g, 98 %)

Fig. S1 1H NMR spectra of 4-hydroxymethyl-1,3-oxazolidine-2-thione.

*Synthesis of benzoic acid 2-thioxo-oxazolidin-4-ylmethyl ester*

A solution of benzoyl chloride (14.6 mL, 126.1 mmol) in dry THF (50 mL) was added to a solution of 4-hydroxymethyl-1,3-oxazolidine-2-thione (14.0 g, 105.1 mmol) in dry THF (250 mL) and triethylamine (17.5 mL, 126.1 mmol) at 0 °C. After 12 h of stirring at room temperature, triethylamine hydrochloride was filtered off, and the solvent was distilled out in vacuo. The residue was purified by silica gel column chromatography eluted with ethyl acetate/acetone (1/1=v/v), followed by recrystallization from a mixed solvent [*n*-hexane/ethyl acetate (3/1=v/v)] to afford benzoic acid 2-thioxo-oxazolidin-4-ylmethyl ester as a colorless solid (20.5 g, 82 %).

Fig. S2 1H NMR spectra of benzoic acid 2-thioxo-oxazolidin-4-ylmethyl ester.

*Synthesis of benzoic acid 2-methylsulfanyl-4,5-dihydro-oxazolinium-4-ylmethyl ester trifluoromethanesulfonate* **1**

Methyl trifluoromethanesulfonate (0.8 mL, 7.2 mmol) was added to a solution of benzoic acid 2-thioxo-oxazolidin-4-ylmethyl ester (1.42 g, 6.0 mmol) in dry acetonitrile (10 mL) at room temperature under dry nitrogen atmosphere. The mixture was stirred for 3 h. After that, the solution was poured into dry diethyl ether and the precipitate was isolated by filtration followed by recrystallization from dichloromethane/*n*-hexane to obtain **1** as a white powder (2.38 g, 99 %). 1H NMR (270 MHz, CD2Cl2, 25 °C): ** = 2.56 (s, 3H; -S-CH3), 4.54–4.70 (m, 2H; -C*H*2-O(C=O)C6H5), 5.02–5.33 (m, 3H; -CH2- and >CH-), 7.49–8.02 (m, 5H; -C6H5), 12.28 (br, 1H; -C=NH+-); 13C NMR (270 MHz, CD2Cl2, 25 °C)** = 183.3 (-C=NH+-), 166.5 (-*C*O2CH3), 134.4, 130.3, 129.5, 129.3, 77.4 (-*C*H2-O(C=O)C6H5), 63.6 (>CH-), 59.2 (-CH2-), 14.7 ppm (-S-CH3); IR (KBr): **= 3178, 3100, 3020, 1720 (>C=O), 1589 (C=NH+), 1473, 1280, 1241, 1164, 1033 cm-1. Elemental analysis (%) calcd for C13H14F3NO6S2 (401.38): C 38.90, H 3.52, N 3.49, S 15.98; found: C 38.74, H 34.7, N 3.49, S 16.05.

Fig. S3 1H NMR spectra of benzoic acid 2-methylsulfanyl-4,5-dihydro-oxazolinium-4-ylmethyl ester trifluoromethanesulfonate **1** in D2O.

## Typical Living cationic polymerization procedure

A solution of 4(*S*)-(methoxycarbonyl)-1,3-oxazolidine-2-thione (**SL**) (0.161g, 1.0 mmol) in CH2Cl2 (1.0 mL) without any purification, containing 2-methyl-2-butene (0.005 %) as a stabilizer, and water (1.0 mL, when needed) was added to a solution of **1** (8.0 mg, 20 mol, [**SL**]/[**1**] = 50) in similar CH2Cl2 (1.0 mL) at 30 °C under air (humidity 89 %). The resulting mixture was subjected to polymerization at 30 °C for 35 h under air. The reaction mixture remained homogeneous during the reaction. After adding methanol for quenching, the resulting mixture was poured into methanol to precipitate a polymer. The polymer was collected by filtration with suction and dried under vacuum. Poly**SL** was obtained as a colorless solid quantitatively. [D30 = -147.3 ° (*c* = 1.0 in DMF); 1H NMR (270 MHz, [D6] DMSO, 25 °C): ** = 2.21 (-S-Me, terminal group), 2.81–3.05 (1H; -CH2-), 3.26–3.42 (1H; -CH2-), 3.60–3.69 (3H; -OCH3), 4.03–4.14 (>CH-, terminal group), 4.15–4.33 (1H; >CH-), 4.43–4.73 (-CH2-, terminal group), 4.73–4.84 (>CH-, terminal group), 7.44–8.07 (-C6H5, terminal group), 8.03–8.52 (-NH-, terminal group), 8.86–9.10 (1H; -NH-); 13C NMR (270 MHz, [D6] DMSO, 25 °C): ** = 170.5 (-S(C=O)NH-), 166.0 (-(*C=*O)OCH3), 54.5 (>CH-), 52.4 (-OCH3), 30.0 (-CH2-); IR (KBr): ** = 3301, 1743 (-O(C=O)C6H5), 1658 (-S(C=O)NH-), 1511, 1203, 1018, 856 cm-1.

Fig. S4 1H NMR spectra of a) polymer obtained under dry nitorogen atmosphere (*M*n = 19540) and b) polymer obtained under air (*M*n = 19605).

Reaction of **1** and **SL** (**1** : **SL** = 1 : 4)

A solution of **SL** (0.032 g, 0.2 mmol) in CH2Cl2 (0.5 mL) was added to a solution of **1** (0.02 g, 0.05 mmol) in CH2Cl2 (0.5 mL) at 30 °C under air. After the mixture was stirred for 2 h, the resulting mixture was concentrated by a rotary evaporator without quenching. The product was characterized by 1H NMR spectroscopy (Fig S5b). The signal assignable to the S-Me group at 2.80 ppm of 1 completely disappeared and that assignable to the S-Me group at 2.31 ppm of initiating end newly appeared instead. The integral ratios of S-Me and aromatic groups in initiating end were in excellent agreement with theoretical value (3 : 5), which can be also observed in the polymers. This data will indicate that the initiating efficiency in this polymerization system is quantitative.

Fig. S5 1H NMR spectra of a) **1**and b) the mixture of **1** and **SL**.

# Postpolymerization reaction

A solution of **SL** (0.48 g, 3.0 mmol) in CH2Cl2 was added to a solution of **1** (0.088 g, 7.29 mol%) in CH2Cl2 (1.0 mL) at 30 °C under air. The mixture was stirred for 30 h. After the complete conversion of **SL** (monitored by 1H NMR spectra), a solution of **SL** (0.97 g, 6.0 mmol) in CH2Cl2 (12 mL) was added remaining solution. After postpolymerization for 60 h, methanol was added for quenching. The resulting mixture was poured into methanol and the precipitate was dried in vacuo to give postpolymer (1.40 g, 97 %). [D30 = -160.3 ° (*c* = 1.0 in DMF); 1H NMR (270 MHz, [D6] DMSO, 25 °C): ** = 2.21 (-S-Me, terminal group), 2.82–3.04 (1H; -CH2-), 3.25–3.42 (1H; -CH2-), 3.60–3.70 (3H; -OCH3), 4.13–4.32 (1H; >CH-), 7.43–8.06 (-C6H5, terminal group), 8.88–9.12 (1H; -NH-); 13C NMR (270 MHz, [D6] DMSO, 25 °C): ** = 170.7 (-S(C=O)NH-), 166.1 (-(*C*=O)OCH3), 54.6 (>CH-), 52.3 (-OCH3), 29.9 (-CH2-); IR (KBr): ** = 3301, 1743 (-(C=O)OCH3), 1658 (-S(C=O)NH-), 1511, 1203, 1018, 856 cm-1.
